# Supplementary material for: “How I wish we could manage such things”: A qualitative assessment of barriers to postpartum hemorrhage management and referral in Kenya
Source: PubMed Central journal article supplement (PMC11530065; doi:10.1371/journal.pgph.0003842), 2024-11-01
Supplement: pgph.0003842.s003.pdf [file pgph.0003842.s003.pdf]

Additional File S4 - Dictionary of codes

| Theme                     |                                                   | Code                                | Subcode                                                              | Description                                                                                                     |                                                                                                                                                            |
|---------------------------|---------------------------------------------------|-------------------------------------|----------------------------------------------------------------------|-----------------------------------------------------------------------------------------------------------------|------------------------------------------------------------------------------------------------------------------------------------------------------------|
| T1                        | Facility Infrastructure, Staffing, and Management | Facility staffing                   | -                                                                    | Description of facility staffing systems, including potential shortage of staff                                 |                                                                                                                                                            |
|                           |                                                   | Support from higher level providers | -                                                                    | Description of availability or responsiveness from higher-level providers in response to emergencies            |                                                                                                                                                            |
| T2                        | PPH Management                                    | Risk Factors for PPH                | -                                                                    | Description of how they typically screen for PPH / identify risk factors for PPH                                |                                                                                                                                                            |
|                           |                                                   | Monitoring for PPH                  | -                                                                    | Description of monitoring actions (or lack thereof) for PPH, including typical procedures and specific PPH case |                                                                                                                                                            |
|                           |                                                   | Causes of PPH                       | -                                                                    | Statement about the most common causes of PPH in their facility                                                 |                                                                                                                                                            |
|                           |                                                   | Identification of PPH               | Methods for identifying PPH                                          | -                                                                                                               | Description of how PPH is typically identified in the facility                                                                                             |
|                           |                                                   |                                     | Measuring blood loss                                                 | -                                                                                                               | Description of how blood loss is measured (in general and for specific patient)<br>Description of the process for estimating/Identifying abnormal bleeding |
|                           |                                                   | Medications and Supplies            | Knowledge of medications and supplies for PPH                        | -                                                                                                               | Description of the types of medications and supplies that can be used for PPH                                                                              |
|                           |                                                   |                                     | Availability of medications and supplies for PPH                     | -                                                                                                               | Description of availability of medicines and supplies for PPH Management                                                                                   |
|                           |                                                   |                                     | Accessibility of medications and supplies for PPH                    | -                                                                                                               | Description of accessibility of medicine and supplies for PPH management within the facility                                                               |
|                           |                                                   | T3                                  | UBT Knowledge, Training, and Perceptions of UBT (device & procedure) | Knowledge of UBT                                                                                                | -                                                                                                                                                          |
| Perceptions of UBT        | -                                                 |                                     |                                                                      | Participant's own perception of UBT                                                                             |                                                                                                                                                            |
| Others' Perception of UBT | -                                                 |                                     |                                                                      | Participant statement on others' perception of UBT                                                              |                                                                                                                                                            |

|                                                                                |                                                    |                                        |                                                                 |                                                                                                                       |
|--------------------------------------------------------------------------------|----------------------------------------------------|----------------------------------------|-----------------------------------------------------------------|-----------------------------------------------------------------------------------------------------------------------|
| T4                                                                             | Referral Processes                                 | Reasons for Referrals                  | -                                                               | Reason for referring the patient to a higher level facility                                                           |
|                                                                                |                                                    | Referral Processes & Decision-making   | Referral decision-making                                        | Description of facility-level roles and responsibilities for making referral decisions                                |
|                                                                                |                                                    |                                        | Referral processes                                              | Description of referral decision for specific PPH case                                                                |
|                                                                                |                                                    | Referral Coordination                  | Exchanging Information                                          | Description of a typical referral process                                                                             |
|                                                                                |                                                    |                                        | Sub-county assistance with referral coordination                | Description of information exchange between PHC and referral hospital                                                 |
|                                                                                |                                                    | Relationships with referral facilities | Poor working relationships with referral hospitals              | Descriptions of sub-county coordination or involvement with referral processes                                        |
|                                                                                |                                                    |                                        | Good (or neutral) working relationships with referral hospitals | Participant description of poor working relationship with referral facilities                                         |
|                                                                                |                                                    | Delays in Referral Processes           | Staffing delays                                                 | Description of good or neutral working relationship with referral facilities                                          |
|                                                                                |                                                    |                                        | Transportation delays                                           | Description of delays in referrals due to staffing-related issues (e.g. provider decision-making, lack of staff, etc) |
|                                                                                |                                                    |                                        | Facility Identification Delays                                  | Description of delays in referrals due to transportation issues (e.g. no ambulance, transport is delayed, etc.)       |
|                                                                                |                                                    | Patient attitudes towards referral     | -                                                               | Description of delays in referrals due to challenges in identifying a facility for referral                           |
|                                                                                |                                                    | Patient attitudes towards referral     | -                                                               | Participant summary of patient attitudes towards referral                                                             |
| Factors that participants note as challenges in managing postpartum hemorrhage |                                                    |                                        |                                                                 |                                                                                                                       |
| T5                                                                             | Data Availability and Use                          | Reviewing PPH Case outcomes            | Lack of formal review processes                                 | Participant describes a lack of formal review processes for PPH cases they have managed                               |
|                                                                                |                                                    |                                        | Formal review processes                                         | Participant describes facility-level efforts to review PPH management                                                 |
| T6                                                                             | Challenges to PPH management & Recommendations for | Challenges in PPH management           | Knowledge & Training                                            | Description of knowledge or training-related challenges to effective PPH management                                   |
|                                                                                |                                                    |                                        | Supply                                                          | Description of supply-related challenges to effective PPH management                                                  |
|                                                                                |                                                    |                                        | Interpersonal/Staffing                                          | Description of interpersonal or staffing-related challenges to effective PPH management                               |

|  |                          |                                |                                                                                       |                                                                          |
|--|--------------------------|--------------------------------|---------------------------------------------------------------------------------------|--------------------------------------------------------------------------|
|  | improvements             |                                | Patient-related challenges                                                            | Description of patient-related challenges to effective PPH management    |
|  |                          |                                | Transportation to other facilities                                                    | Description of transport-related challenges to effective PPH management  |
|  |                          |                                | No challenges in PPH management                                                       | Description of not perceiving any challenges to effective PPH management |
|  | Improving PPH management | -                              | Recommendations for improving PPH management in their facility                        |                                                                          |
|  | Barriers to UBT Use      | Lack of experience or training | Description of lack of experience or training as a barrier to UBT use                 |                                                                          |
|  |                          | Supply                         | Description of supplies as a barrier to UBT use                                       |                                                                          |
|  |                          | Acceptability of UBT           | Description of the acceptability of UBT (device or procedure) as a barrier to UBT use |                                                                          |
|  | Improving UBT use        | -                              | Recommendations for improving UBT use in their facility                               |                                                                          |
